# Supplementary material for: RT-qPCR Detection of SARS-CoV-2: No Need for a Dedicated Reverse Transcription Step
Source: Int J Mol Sci. 2022 Jan 24;23(3):1303. doi: 10.3390/ijms23031303 (PMC8835954; doi:10.3390/ijms23031303)
Supplement: Supplementary file 1 [file ijms-23-01303-s001.zip › ijms-1520356-Supplementary Data.xlsx]

## Sheet: Reagents etc
Supplier	Product	Order No
Premier Biosoft, San Francisco, USA	Beacon Designer	N/A
BioRad Watford UK	CFX Connect qPCR instrument	1855200
	qPCR plates	HSS9665
	qPCR Plate Heat Seal	1814030
	PX1 PCR Plate Sealer	1814000
Cole Palmer, St Neots, UK	PCRMax	WZ-93947-00
	48-well plates	WZ-93947-99
Eurofins Technologies, Budapest, Hungary	GSD Novaprime Real-Time RT-PCR kit	PCOV6033
Meridian Bioscience, London UK	SensiFast SYBR No-ROX	BIO-98050
	SensiFast Probe No-ROX	BIO-86050
NEB, Hitchin, UK	Luna 1 step RT-qPCR mix	E30005E
PCRBio London UK	1step Go RT-PCR kit	PB10.53-10
	Ultrascript 2.0 RT	PB30.33-01
PrimerDesign, Camberley, UK	oasig Lyophilised qPCR Master Mix	oasig-standard-150
Quantabio, Beverley, MA, USA	qScript XLT One-Step RT-qPCR ToughMix	95132-500
Roche, Welwyn Garden City, UK	KAPA probe Fast qPCR kit	KK4701
Takara Bio, Saint-Germain-en-Laye France	One Step PrimeScript III	RR600A
ThermoFisher Scientific Paisley UK	SS4 Vilo	11756050
	Nuclease-free water	R0582
	TaqPath 1‑Step RT‑qPCR Master Mix	A15299
G-Storm Catcombe Somerset UK	GS1 Thermal Cycler	N/A
Biomolecular Systems	MIC qPCR instrument	N/A

## Sheet: Data sheet S1
Target	E-gene (assay E1) probe							Target	Nsp10 (assay N1) probe
Temp (ºC)	25+50	50	30	21	NTC	NEC		Temp (ºC)	25+50	50	30	21	NTC	NEC
Cq1	25.1775	24.7849	25.0777	25.3213	ND	ND		Cq1	26.41	26.42	26.35	26.73	ND	ND
Cq2	25.0489	24.8965	25.0602	25.2602	ND	ND		Cq2	26.41	26.3717	26.43	26.71	ND	ND
Target	E-gene (assay E1) SYBR							Target	Nsp10 (assay N1) SYBR
Temp (ºC)	50	21	NTC					Temp (ºC)	50	21	NTC
Cq1	26.53	26.56	34.31					Cq1	26.2716	27.2143	34.96
Tm (ºC)	79	79	76					Tm (ºC)	77.5	77.5	74
E1	Freezer	8h	24h	5 days	NTC			N1	Freezer	8h	24h	5 days	NTC
Cq1	30.1551	30.0142	30.2074	30.03	ND			Cq1	31.13	29.5709	29.2075	30.26	ND
Cq2	29.9406	29.8679	30.1247	30.25	ND			Cq2	30.1291	29.5339	29.3185	29.73	ND
Target	E-gene (assay E1) Eco							Target	Nsp10 (assay N1) Eco
Temp (ºC)	25+50	50	30	21				Temp (ºC)	25+50	50	30	21
Cq1	24.015	24.2379	23.8276	24.4274				Cq1	25.3467	26.1156	25.9106	26.3144
Cq2	23.7922	23.9534	24.0226	24.3688				Cq2	24.944	25.3946	25.5394	26.0437
Cq3	24.3177	24.097	24.1637	24.0825				Cq3	25.4815	25.3655	25.5156	25.8372
Cq4	23.9801	24.0837	23.9262	24.3008				Cq4	25.1942	25.4343	25.5631	25.6175

## Sheet: Data sheet S2
Figure 2A
Temperature (ºC)	E1		E1 (rpt)		E2		E3		N1		N2		N3
30	28.06	27.9	27.97	27.94	30.2674	30.0137	29.8249	29.8438	30.16	30.47	29.8691	30.0815	30.6122	30.9415
31.2	28.03	27.76	27.39	27.5	30.1551	30.0394	29.6705	29.7392	29.35	28.98	30.3014	30.0934	30.8832	30.919
33.8	27.99	27.75	27.22	27.36	30.5579	30.3107	28.971	28.9042	29.13	28.55	29.4069	29.487	31.0127	30.9387
37.6	27.64	27.5	27.09	26.78	29.5351	29.5337	29.47	29.4578	28.95	28.57	29.4611	29.4587	30.2231	30.5925
42.4	27.28	27.21	27.29	26.48	29.4196	29.3272	29.5957	29.5348	28.61	28.28	29.2977	29.3789	30.3285	30.4297
46.5	27.68	27.53	27.07	27.11	29.727	29.59	29.8155	30.0537	29.15	29.09	29.6118	29.6321	30.3973	30.6227
48.8	28.17	28.03	27.41	27.29	29.9453	29.8818	30.084	29.9425	29.73	29.33	29.616	29.9767	31.1253	30.8098
50	28.06	27.97	27.63	27.44	30.2042	30.204	30.0366	30.0901	29.12	28.57	29.7725	29.8886	30.8844	30.802
Figure 2B
Temperature (ºC)	E1		E1 (rpt)		E2		E3		N1		N2		N3
30	28.0348	28.0867	27.7159	27.7217	28.8634	28.9861	29.7927	29.6516	27.9368	28.0228	28.8982	28.8156	29.5132	29.4647
31.2	27.3366	27.6445	27.1938	27.1766	28.4128	28.7337	29.2974	29.2191	28.1645	28.0848	28.3559	28.7676	28.4685	28.9469
33.8	27.7431	27.8235	26.8669	27.1672	28.6126	28.4194	29.205	29.3064	28.0832	27.82	28.4523	28.7873	28.916	28.778
37.6	26.847	26.6382	26.7056	26.6179	27.7087	27.8325	28.923	29.0826	27.4465	27.4593	28.2841	28.2357	28.3943	28.55
42.4	26.854	26.7486	27.1082	26.8943	27.881	28.0251	28.729	28.844	27.2357	27.2172	28.38	28.3881	28.6374	28.2793
46.5	27.2127	27.1228	26.6417	26.5022	28.3545	27.815	28.565	28.852	27.7238	27.7636	28.471	28.5023	28.8944	29.0138
48.8	27.1525	27.0428	26.8257	26.8018	28.0426	27.8116	28.4836	28.835	28.0182	28.1002	28.8387	28.7562	29.0734	29.1849
50	27.7295	27.2875	26.8769	27.0506	28.3757	28.3019	28.7933	28.9642	28.1409	28.139	28.8646	28.9224	28.853	29.1128

## Sheet: Data sheet S3
SS4 50ºC							UltraScript 50ºC
	E1	E2	E3	N1	N2	N3		E1	E2	E3	N1	N2	N3
Cq1	24.2722	26.0761	28.0968	24.8158	25.0638	25.8162	Cq1	26.0732	28.2833	29.8508	26.5385	26.7038	27.6912
Cq2	24.1552	26.0052	28.3151	24.9985	25.0005	25.861	Cq2	26.0427	28.3531	29.6911	26.9476	26.6915	27.5968
SS4 21ºC							UltraScript 21ºC
	E1	E2	E3	N1	N2	N3		E1	E2	E3	N1	N2	N3
Cq1	25.0799	26.7421	28.664	26.0382	25.8541	26.6033	Cq1	26.6546	29.6607	31.0025	29.4375	29.3447	29.975
Cq2	24.757	26.728	28.6101	25.8227	25.7707	26.5215	Cq2	26.6378	29.6078	30.6109	29.2327	29.1041	30.0028
	E1		E2		E3		N1		N2		N3
SS4	50ºC	21ºC	50ºC	21ºC	50ºC	21ºC	50ºC	21ºC	50ºC	21ºC	50ºC	21ºC
RT1	26.2063	26.1026	27.1002	27.6131	26.9874	27.8078	27.2296	27.4412	26.3579	27.9842	27.7405	28.0835
RT2	25.4279	25.8146	27.0841	27.3694	27.5801	27.5952	27.3491	27.5042	26.9619	27.7554	27.7201	28.2162
RT3	25.6406	26.0147	27.4419	27.8472	27.2367	27.9448	26.6766	27.5585	27.0483	27.5659	27.9144	28.2634
RT4		25.3822		28.0484		27.3981		27.2206		28.1029		28.6855
RT5		26.1067		27.2373		27.9028		27.5824		27.5106		28.3999
RT6		26.095		27.433		27.381		27.0779		27.0787		28.236
RT7		26.2095		28.3635		27.8827		27.8171		27.385		28.3417
RT8		26.2601		27.7229		27.9771		28.6126		27.5643		28.0798
RT9		26.4926		28.5336		28.358		27.8085		27.4596		28.1083
Repeat experiment 1
SS4							UltraScript
50ºC	E1	E2	E3	N1	N2	N3	50ºC	E1	E2	E3	N1	N2	N3
Cq1	27.4977	29.1546	29.0296	28.5427	28.2855	29.0237	Cq1	27.0065	28.3467	28.0425	26.6222	28.1564	28.9702
Cq2	27.4667	28.9332	29.0283	28.2834	28.1789	29.0938	Cq2	27.0123	28.4301	28.3464	26.6043	28.0719	29.0314
SS4							UltraScript
21ºC	E1	E2	E3	N1	N2	N3	21ºC	E1	E2	E3	N1	N2	N3
Cq1	28.0363	29.5244	29.4787	29.2294	29.275	29.9099	Cq1	27.6038	29.236	28.6601	27.3616	29.1467	30.1094
Cq2	28.0811	29.4997	29.532	29.1973	29.0228	30.1143	Cq2	27.6959	29.2023	28.7095	27.3526	29.186	30.1824
Repeat experiment 2
SS4 50ºC							UltraScript 50ºC
	E1	E2	E3	N1	N2	N3		E1	E2	E3	N1	N2	N3
Cq1	23.8968	25.8014	25.36	25.0047	24.732	25.4631	Cq1	25.5915	31.5336	30.13	26.5264	26.4272	27.1498
Cq2	23.7312	25.3003	25.01	24.863	24.6222	25.5993	Cq2	25.5365	30.8408	29.6569	25.9304	26.2434	27.0918
SS4 21ºC							UltraScript 21ºC
	E1	E2	E3	N1	N2	N3		E1	E2	E3	N1	N2	N3
Cq1	24.2462	26.0916	26.14	25.6075	25.1706	26.2534	Cq1	26.7003	32.8996	31.1196	29.3123	29.146	29.8435
Cq2	24.2068	26.1157	26.03	25.5505	25.2672	26.0864	Cq2	26.6276	32.2972	31.2146	29.1699	28.5306	29.4776

## Sheet: Data sheet S4
RNA sample 1
SS4/Eco	50ºC 1	50ºC 2	50ºC 3	50ºC 4
Cq1	27.0365	27.5634	25.5354	27.9359
Cq2	27.1255	27.4621	25.5928	27.4549
Cq3	27.2089	27.5265	25.7732	27.4246
SS4/Eco	21ºC 1	21ºC 2	21ºC 3	21ºC 4	21ºC 5	21ºC 6	21ºC 7	21ºC 8	21ºC 9
Cq1	26.7527	27.116	27.6119	28.061	28.887	27.9205	27.372	27.7631	28.2614
Cq2	27.0262	27.1764	27.6653	28.1462	28.3188	28.092	27.3781	27.9277	28.2252
Cq3	26.8369	26.8824	27.475	28.0605	28.2751	27.6119	27.3686	27.9522	28.1044
RNA sample 1
SS4/CFX	50ºC 1	50ºC 2	50ºC 3	50ºC 4
Cq1	27.9707	28.5293	26.5892	28.4841
Cq2	27.8942	28.3337	26.6525	28.3472
SS4/CFX	21ºC 1	21ºC 2	21ºC 3	21ºC 4	21ºC 5	21ºC 6	21ºC 7	21ºC 8	21ºC 9
Cq1	27.2688	27.2004	27.5865	28.1447	28.226	28.3615	27.6986	28.0061	28.2537
Cq2	27.1179	27.1418	27.5799	28.1765	28.2942	28.4815	27.7102	28.0874	28.2536
	-0.701854
RNA sample 2
CFX	5' 50ºC	5' 21ºC
RT Replicate 1	23.9121	24.3705
RT Replicate 2	24.0407	24.6239
RT Replicate 3	23.3242	24.6906
RT Replicate 4	24.0175	24.5068
RT Replicate 5	23.829	24.3794
RT Replicate 6	24.2789	24.2187
RT Replicate 7		23.8368
RT Replicate 8		24.2642
RT Replicate 9		24.0083
RT Replicate 10		24.3181
RT Replicate 11		24.6849
RT Replicate 12		23.9666
RNA sample 3
CFX	5' 50ºC	5' 21ºC
RT Replicate 1	26.2267	26.8355
RT Replicate 2	26.1844	26.6161
RT Replicate 3	26.2323	26.6613
RT Replicate 4	26.147	26.585
RT Replicate 5	26.2634	26.3821
RT Replicate 6	26.3638	27.0305

## Sheet: Data  sheet S5
50ºC SS4	N1	N1 (rpt)	N2	N2 (rpt)	N3	N3 (rpt)
Cq1	27.7948	27.9285	27.1907	27.37	27.9937	27.7621
Cq2	27.6319	28.2959	27.1004	27.3348	27.9102	27.9588
0ºC	N1	N1 (rpt)	N2	N2 (rpt)	N3	N3 (rpt)
Cq1	30.9879	30.7108	30.2159	30.1882	30.2839	30.4855
Cq2	31.0066	30.633	30.1878	30.2859	30.2401	30.5714
50ºC US2	N1	N1 (rpt)	N2	N2 (rpt)	N3	N3 (rpt)
Cq1	27.9103	27.9126	26.6978	27.2265	28.219	28.0329
Cq2	27.7857	27.9068	27.0076	27.2263	28.1879	28.2149
0ºC	N1	N1 (rpt)	N2	N2 (rpt)	N3	N3 (rpt)
Cq1	29.7872	29.5064	29.2864	29.3588	30.6789	31.2039
Cq2	30.416	30.1021	30.0238	29.8787	30.7843	31.5996
US2
5' 50ºC	1	2	3	4	5	6	7	8	9	10
Cq1	25.1118	24.3632	26.2548	25.0253	24.9188	25.6176	25.6886	24.5341	24.684	25.086
Cq2	24.5268	24.4928	25.6513	24.8641	24.3358	25.2596	25.5803	24.1793	24.709	24.6439
5' 21ºC	1	2	3	4	5	6	7	8	9	10
Cq1	25.1145	24.263	24.4316	25.5921	24.2821	24.5004	24.7204	24.2788	24.2676	24.1985
Cq2	25.1151	24.1517	24.1993	25.6382	24.1728	24.5573	24.6264	24.1231	24.227	24.1041
5' 0ºC	1	2	3	4	5	6	7	8	9	10
Cq1	27.5163	27.8462	27.7578	27.6322	28.4746	28.2372	29.1703	29.0472	28.9672	28.8198
Cq2	28.1485	27.6662	27.6448	27.4924	28.5474	27.4093	29.2142	29.0153	29.1993	28.1425
RT Temp E1	50ºC	30ºC	21ºC	0ºC	NTC
Cq1	24.9192	25.0027	25.3445	25.7044	ND
Cq2	24.8211	24.605	25.1584	25.6483	ND
Cq3	24.5832	24.7341	25.1682	25.7192	ND

## Sheet: Data sheet S6
	50ºC	30ºC RT			21ºC RT			0ºC RT			NTC
E1	5 min	2.5 min	5 min	10 min	2.5 min	5 min	10 min	2.5 min	5 min	10 min	5 min
RT1	26.5211	26.5018	25.6156	24.6957	27.2325	26.0078	24.9588	29.9955	29.4724	27.6902	ND
RT2	25.3687	26.0888	25.2473	24.861	27.0066	26.0576	25.0073	29.147	27.5794	27.1312	ND
RT3	25.2746	25.901	25.5129	24.9107	27.0805	25.791	24.6703	29.3776	28.332	27.5831
RT4	25.2849	25.9233	25.5251	25.2675	26.597	25.7137	24.5401	29.3048	28.33	27.1105
	50ºC	30ºC RT			21ºC RT			0ºC RT			NTC
N1	5 min	2.5 min	5 min	10 min	2.5 min	5 min	10 min	2.5 min	5 min	10 min	5 min
RT1	27.0295	27.0314	26.2695	25.2981	28.0465	28.1166	26.1956	31.4078	28.8276	28.5666	37.008
RT2	26.6947	26.7227	26.7429	28.4584	27.9184	27.0684	25.6008	30.2391	28.6868	28.1789	33.3885
RT3	25.6538	26.5813	26.233	25.4761	28.9314	27.0459	25.7572	30.685	29.6078	28.4498
RT4	26.6353	26.9565	26.3833	25.7355	27.2033	27.9638	25.8713	29.9177	29.1738	28.9677

## Sheet: Data sheet S7
	E1				E2				E3				N1				N				N3
SS4	50ºC H+SP	50ºC H	21ºC H+SP	21ºC H	50ºC H+SP	50ºC H	21ºC H+SP	21ºC H	50ºC H+SP	50ºC H	21ºC H+SP	21ºC H	50ºC H+SP	50ºC H	21ºC H+SP	21ºC H	50ºC H+SP	50ºC H	21ºC H+SP	21ºC H	50ºC H+SP	50ºC H	21ºC H+SP	21ºC H
Cq1	26.5785	28.4843	27.0101	27.1206	28.5082	29.6314	28.4921	28.7043	28.2319	29.2442	28.5904	28.3721	28.0737	28.7965	28.5061	28.5033	28.079	28.9293	28.2542	28.4914	29.0676	29.9275	29.3873	29.3029
Cq2	26.7095	28.9455	26.8458	26.9893	28.1915	29.3947	28.5661	28.4676	28.1257	29.4325	28.5291	28.2673	28.0818	28.9199	28.382	28.3983	28.3169	28.9052	28.2954	28.2741	29.0076	30.061	29.4188	29.279
Cq3	27.0372	28.4405	26.8518	26.9458	28.1982	29.5009	28.4434	28.5001	27.9605	29.1489	28.3472	28.7053	28.0252	28.7428	28.2878	28.5912	28.0834	28.9525	28.4719	28.3657	28.841	30.0285	29.2152	29.0429
Cq4	26.6345	28.3081	26.8259	27.1296	28.1289	29.8915	28.3588	28.6857	28.1756	29.2351	28.4933	28.3643	28.1014	29.1155	28.39	28.647	27.992	29.1719	28.4641	28.6808	28.8364	30.0725	29.1721	29.3696
	E1				E2				E3				N1				N				N3
UltraScript	50ºC H+SP	50ºC H	21ºC H+SP	21ºC H	50ºC H+SP	50ºC H	21ºC H+SP	21ºC H	50ºC H+SP	50ºC H	21ºC H+SP	21ºC H	50ºC H+SP	50ºC H	21ºC H+SP	21ºC H	50ºC H+SP	50ºC H	21ºC H+SP	21ºC H	50ºC H+SP	50ºC H	21ºC H+SP	21ºC H
Cq1	27.5465	29.1474	28.3763	29.2723	30.6437	30.5025	32.4985	30.9642	30.3154	30.9204	31.3122	31.0862	30.0496	30.7526	29.9017	30.164	30.023	30.2272	29.9397	30.1419	30.5408	31.5445	29.9397	30.5507
Cq2	27.5108	29.007	28.5395	28.8555	30.6738	30.5078	32.0368	30.9855	30.1259	30.6119	31.425	30.8306	30.0918	30.6559	29.9908	30.01	29.7595	30.5479	29.6043	30.1033	30.4773	31.4219	30.2436	30.6426
Cq3	27.5683	28.9264	28.3714	28.8631	30.3613	30.7608	32.1748	30.9679	30.1864	30.7982	31.075	30.7118	29.9278	31.1381	29.828	30.2267	29.8785	30.5756	29.645	30.0961	30.4651	31.1862	30.2483	30.6135
Cq4	27.6201	29.138	28.476	29.2163	30.4014	30.7874	32.1824	31.336	30.1127	30.8886	31.2697	31.1166	30.1354	30.8788	29.9144	30.2001	29.8725	30.5459	29.7752	30.072	30.5044	31.3044	30.1481	30.6075

## Sheet: Data sheet S8
MM	PS3			UltraScript			Sigma			NovaPrime
Condition	10' 50ºC	1' 50ºC	5' 21ºC	10' 50ºC	1' 50ºC	5' 21ºC	10' 50ºC	1' 50ºC	5' 21ºC	10' 50ºC	1' 50ºC	5' 21ºC
Cq1	24.2293	24.4619	24.4821	23.7292	24.6078	25.3513	23.3641	24.6641	25.1324	23.4089	24.0323	24.1759
Cq2	24.2162	24.2848	24.3506	23.9305	24.7939	25.1049	23.7945	24.4772	24.7729	23.9955	23.7707	24.1709
Cq3	24.1758	24.1904	24.3335	24.2052	24.1887	24.9656	24.1566	24.3627	25.0662	24.2397	23.8155	23.9993
Cq4	24.2646	24.4079	24.3266	25.1272	24.2498	25.0497	24.3614	24.5376	24.621	24.4121	24.3099	24.1595
Eco
5' 50ºC	PS3	UltraScript	Sigma	NovaPrime
Cq1	23.7124	23.8277	23.638	24.1351
Cq2	23.685	23.6808	24.0742	23.9992
Cq3	23.6338	24.0599	23.9722	23.4493
5' 21ºC	PS3	UltraScript	Sigma	NovaPrime
Cq1	23.3063	25.0723	25.771	23.5912
Cq2	23.4618	25.0622	25.7262	23.3797
Cq3	23.1143	25.1316	25.7	23.2938
Eco
5' 21ºC	PS3	UltraScript	Sigma	NovaPrime
Cq1	23.051	22.4699	23.5103	22.4578
Cq2	22.9708	22.6837	23.1559	22.1299
Cq3	23.0692	22.5965	22.7932	22.0006
Mic A	50ºC	21ºC		Mic B	50ºC	21ºC
RT1	25.2086	25.7554		RT1	25.1529	25.8255
RT2	25.2143	25.7966		RT2	25.163	25.8501
RT3	25.2031	25.8272		RT3	25.201	26.0823
RT4	25.2474	25.9087		RT4	25.2094	25.7499
RT5	25.2844	25.8141		RT5	25.2923	25.7321
RT6	25.298	25.8698		RT6	25.3253	25.6844
RT7	25.2536	25.8557		RT7	25.3295	25.7835
RT8	25.2943	25.8831		RT8	25.327	25.6497
RT9	25.1838	25.8343		RT9	25.2383	25.5928
RT10	25.2943	25.8419		RT10	25.1988	25.5041

## Sheet: Data sheet S9
Figure 6
T (ºC)	iTaq	Luna	NovaPrime	PCRBio	PS3	Sigma	TaqPath
30	26.3604	29.2701	25.4086	24.9173	25.0053	24.7017	25.0376
31.2	26.2641	30.7178	25.1106	25.3685	24.5831	24.8564	25.1783
33.8	26.0127	29.7284	24.6116	24.6343	24.6267	24.4832	25.0699
37.6	25.7324	27.6379	24.4704	23.9954	24.7493	24.2276	25.0436
42.5	25.3388	25.8126	24.5525	23.5628	25.0496	23.4664	24.4502
46.5	25.2654	24.9102	24.8385	23.258	25.3048	23.3796	24.2225
48.8	25.3205	24.6081	24.5962	23.2261	25.0141	23.4666	24.3066
50	25.456	24.7711	24.5143	23.4835	25.063	23.6222	24.5191
MM	PS3		UltraScript		Sigma
T (ºC)	E1	N1	E1	N1	E1	N1
30	23.7491	24.8309	24.1226	24.3591	25.1305	28.2362
31.2	23.4522	24.4796	23.5015	24.2164	24.5493	26.6201
33.8	23.6321	24.4851	23.3168	24.0211	24.1688	27.4062
37.6	23.4547	24.8478	23.0565	23.8388	23.6177	26.1084
42.5	23.2993	25.6929	22.6435	23.549	23.2334	25.0801
46.5	23.204	26.7606	22.5336	23.6895	22.9705	24.0953
48.8	23.2157	27.0144	22.5719	24.0801	23.4044	23.578
50	23.365	25.9103	23.0793	24.2668	23.3055	23.5248
	Probe			SYBR
RT Temp	50ºC	30ºC	21ºC	50ºC	21ºC	Cq
Cq1	26.2203	26.1097	26.0375	24.5815	24.5933	24.5272
Cq2	26.147	25.9395	26.1088	24.4982	24.3791	24.4265
Cq3	26.112	26.0572	26.0304	24.5852	24.4362	24.5327
Cq4	26.0871	26.12	25.938	24.5795	24.7675	24.5342
Cq5	26.1139	26.045	26.1443	24.6638	24.6401	24.403
Cq6	26.1313	26.0822	26.109	24.5904	24.6334	24.5236
Cq7			26.1407			24.5332
Cq8			26.2229			24.3899
Cq9			26.313			24.4798
Cq10			26.0816			24.4874
Cq11			26.2098			24.7322
Cq12			26.081			24.5445

[truncated: 3 more sheets: Data sheet S10, Data sheet S11, Data sheet S12]
